# Supplementary material
Source: PubMed Central journal article supplement (PMC3592076)
Supplement: JCM.02119-12_zjm999092306so1.pdf [file JCM.02119-12_zjm999092306so1.pdf]

## SUPPLEMENTAL MATERIALS

### A) Central/West Africa

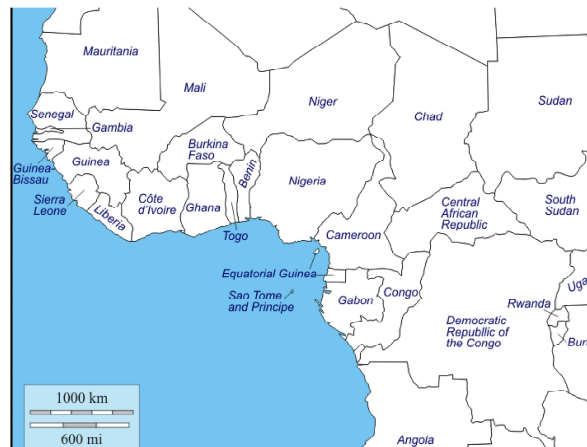

### B) Cameroon

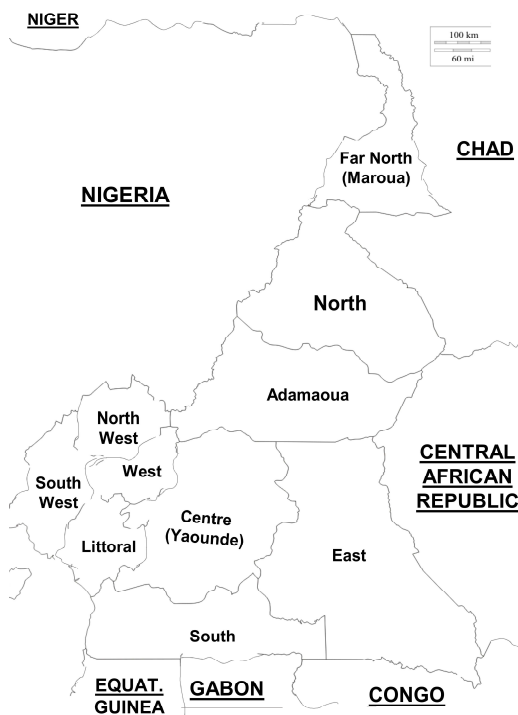

### C) Far North region of Cameroon

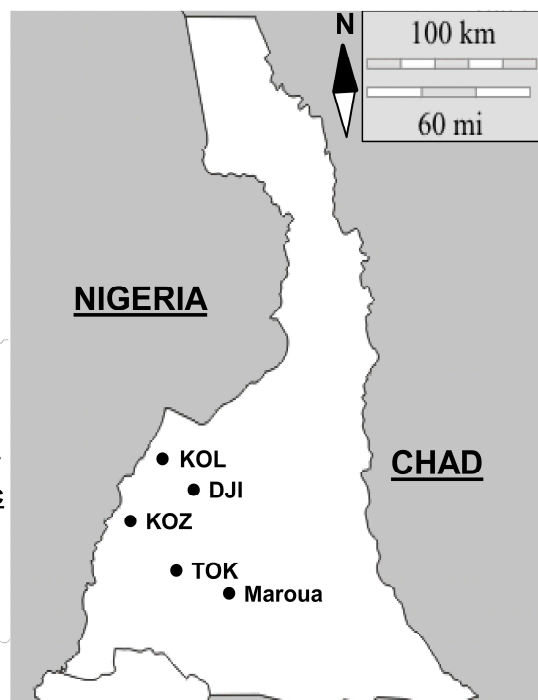

**Figure S1. Geographic areas where the stool specimens and isolates originated from.** A- Central/West Africa. B- Cameroon and neighboring countries. C- Far North region of Cameroon. The rural districts of Djinglya (DJI); Kolofata (KOL); Koza (KOZ); and Tokombere (TOK,) are indicated. The urban districts of Djarengol (DJA); Dougoi (DOU); and Founangue (FOU) are located in Maroua town. The figure was drawn with some outline maps provided by d-maps.com (<http://d-maps.com/index.php?langfr>).

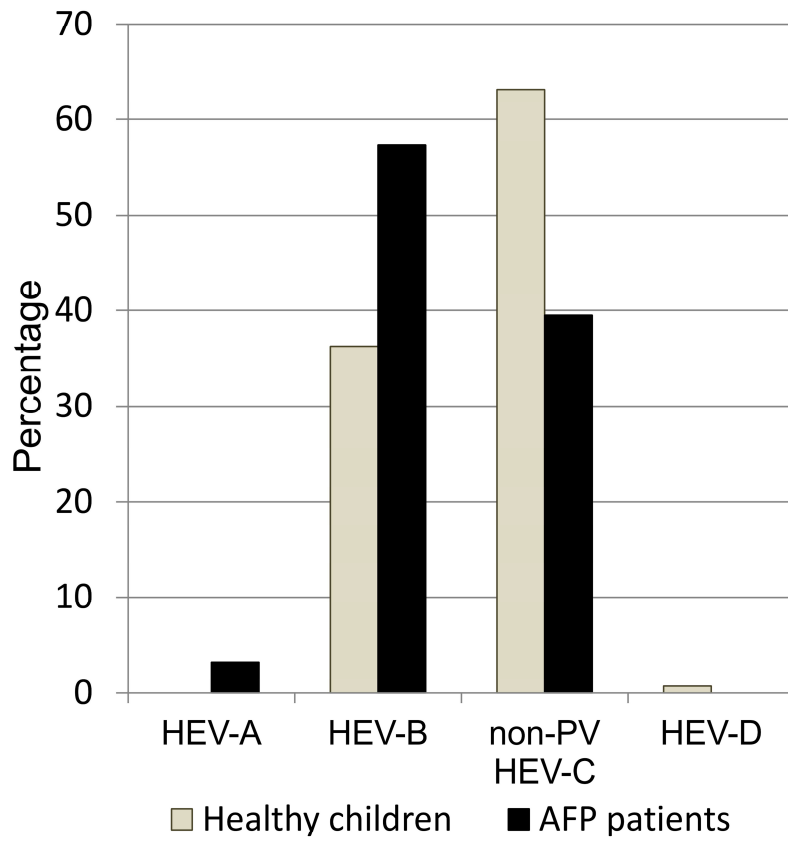

**Figure S2. Distribution of NPEV species identified in healthy children and AFP patients in Cameroon and Neighboring countries.** 100% refers to the total number of NPEVs isolated from each population.

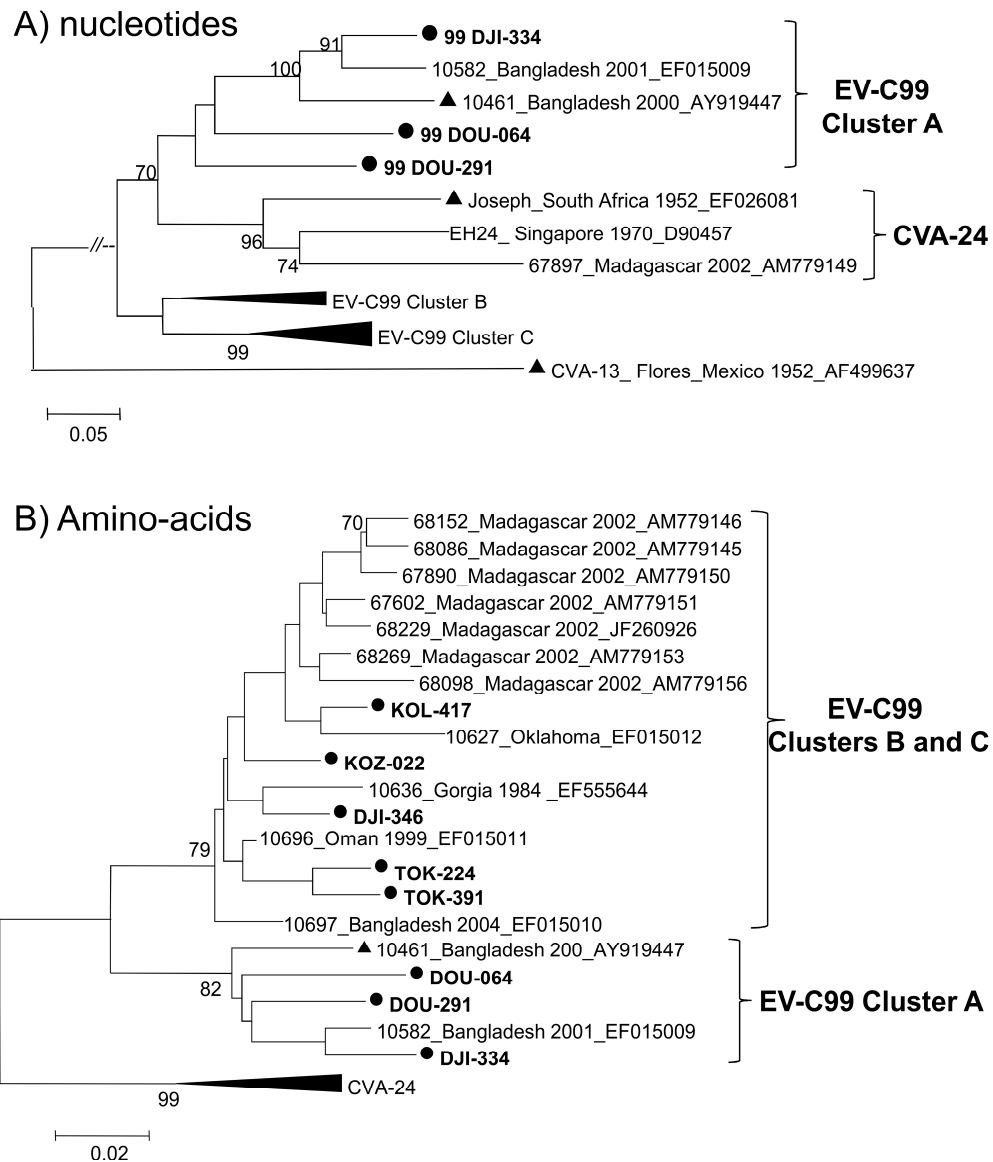

**Figure S3. Phylogenetic relationships of CVA-24 and EV-C99 isolates.** A- Phylogram based on the alignment of the partial 5'-third of the VP1 sequences (nt 1-300 according to the CVA-24 prototype strain Joseph VP1 numbering). B- Phylogram based on the deduced aa sequences of the complete VP1 sequences. Nucleotide and protein distances were calculated using the Jukes-Cantor corrected model and PAM-001 matrix (Dayhoff *et al.*, 1979), respectively. The phylogenetic relationships were reconstructed using the neighbor-joining algorithm implemented in MEGA 5.05. The newly sequenced Cameroonian strains are highlighted by circle (●) and prototype strains are emphasized by triangles (▲). The reliability of the tree topology was assessed with 1000 bootstrap pseudoreplicates. Bootstrap values less than 70 have been omitted. The scale bars indicate nucleotide and amino acid distances as substitutions per site.

**Table S1. Full-length VP1 sequencing and typing of 67 studied HEV-C strains.**

| Isolate <sup>a</sup> | Highest identity score (%) <sup>b</sup> |      |      | Second-highest identity score (%) <sup>b</sup> |      |      | Delta score (%) <sup>c</sup> | Genotype <sup>d</sup> | serotype support <sup>d</sup> | Accession no. |
|----------------------|-----------------------------------------|------|------|------------------------------------------------|------|------|------------------------------|-----------------------|-------------------------------|---------------|
|                      | Type                                    | nt   | aa   | Type                                           | nt   | aa   |                              |                       |                               |               |
| DOU-057              | CVA-11                                  | 80.2 | 95.4 | EV-99                                          | 66.0 | 67.4 | 14.2                         | CVA-11                | 100                           | JX417821      |
| C08-011              | CVA-13                                  | 73.8 | 86.7 | CVA-17                                         | 69.6 | 80.6 | 4.2                          | CVA-13                | 99                            | JX417824      |
| C08-016              | CVA-13                                  | 73.1 | 90.9 | CVA-17                                         | 70.7 | 82.5 | 2.5                          | CVA-13                | 98                            | JX417825      |
| C08-074              | CVA-13                                  | 73.7 | 90.3 | CVA-17                                         | 70.6 | 81.2 | 3.1                          | CVA-13                | 98                            | JX417826      |
| C08-096              | CVA-13                                  | 77.1 | 93.5 | CVA-20                                         | 68.6 | 77.0 | 8.5                          | CVA-13                | 99                            | JX417851      |
| C08-102              | CVA-13                                  | 74.5 | 89.6 | CVA-20                                         | 68.5 | 78.0 | 6.0                          | CVA-13                | 100                           | JX417827      |
| C08-139              | CVA-13                                  | 75.0 | 91.3 | EV-102                                         | 69.9 | 78.3 | 5.1                          | CVA-13                | 100                           | JX417828      |
| C08-195              | CVA-13                                  | 73.4 | 90.6 | CVA-17                                         | 70.8 | 83.2 | 2.6                          | CVA-13                | 99                            | JX417829      |
| DJA-088              | CVA-13                                  | 76.3 | 94.5 | CVA-17                                         | 70.6 | 81.6 | 5.7                          | CVA-13                | 100                           | JX417830      |
| DJA-303              | CVA-13                                  | 73.1 | 90.9 | CVA-17                                         | 70.7 | 82.2 | 2.5                          | CVA-13                | 99                            | JX417831      |
| DJI-042              | CVA-13                                  | 76.7 | 94.5 | CVA-17                                         | 70.4 | 80.9 | 6.3                          | CVA-13                | 100                           | JX417832      |
| DJI-333              | CVA-13                                  | 75.3 | 90.3 | CVA-17                                         | 68.1 | 79.9 | 7.2                          | CVA-13                | 100                           | JX417833      |
| DJI-337              | CVA-13                                  | 73.6 | 89.3 | CVA-17                                         | 70.4 | 79.9 | 3.18                         | CVA-13                | 99                            | JX417834      |
| FOU-276              | CVA-13                                  | 79.8 | 95.5 | CVA-20                                         | 70.1 | 79.6 | 9.7                          | CVA-13                | 100                           | JX417835      |
| KOL-152              | CVA-13                                  | 72.7 | 90.3 | CVA-17                                         | 70.7 | 81.6 | 2.1                          | CVA-13                | 96                            | JX417836      |
| KOL-169              | CVA-13                                  | 72.2 | 87.7 | CVA-20                                         | 66.8 | 75.7 | 5.4                          | CVA-13                | 93                            | JX417837      |
| KOL-365              | CVA-13                                  | 71.6 | 86.7 | CVA-17                                         | 70.9 | 80.9 | 0.7                          | CVA-13                | 100                           | JX417838      |
| KOL-408              | CVA-13                                  | 73.0 | 91.9 | CVA-17                                         | 71.8 | 82.5 | 1.2                          | CVA-13                | 100                           | JX417839      |
| KOL-415              | CVA-13                                  | 73.6 | 89.3 | CVA-20                                         | 69.7 | 77.7 | 3.9                          | CVA-13                | 98                            | JX417840      |
| KOL-427              | CVA-13                                  | 77.2 | 95.8 | EV-102                                         | 70.7 | 79.0 | 6.6                          | CVA-13                | 98                            | JX417841      |
| KOZ-012              | CVA-13                                  | 74.1 | 89.0 | CVA-17                                         | 70.6 | 79.9 | 3.6                          | CVA-13                | 97                            | JX417842      |
| KOZ-015              | CVA-13                                  | 73.8 | 90.9 | CVA-17                                         | 69.5 | 82.2 | 4.3                          | CVA-13                | 99                            | JX417843      |
| KOZ-021              | CVA-13                                  | 73.4 | 90.3 | CVA-17                                         | 69.8 | 82.2 | 3.6                          | CVA-13                | 99                            | JX417844      |
| T08-086              | CVA-13                                  | 75.1 | 91.6 | CVA-17                                         | 71.5 | 83.5 | 3.6                          | CVA-13                | 96                            | JX417845      |

|                |                 |             |             |               |             |             |            |               |            |                 |
|----------------|-----------------|-------------|-------------|---------------|-------------|-------------|------------|---------------|------------|-----------------|
| T08-205        | CVA-13          | 78.0        | 94.2        | EV-102        | 68.9        | 79.0        | 9.1        | CVA-13        | 97         | JX417846        |
| TOK-200        | CVA-13          | 72.8        | 87.1        | CVA-17        | 68.8        | 80.9        | 4.04       | CVA-13        | 91         | JX417847        |
| TOK-349        | CVA-13          | 78.4        | 94.5        | EV-102        | 69.7        | 79.0        | 8.7        | CVA-13        | 100        | JX417848        |
| TOK-387        | CVA-13          | 76.6        | 93.5        | CVA-20        | 69.6        | 78.0        | 7.0        | CVA-13        | 98         | JX417849        |
| TOK-388        | CVA-13          | 78.2        | 93.9        | EV-102        | 70.6        | 81.9        | 7.7        | CVA-13        | 99         | JX417850        |
| DJA-304        | CVA-17          | 77.3        | 93.8        | CVA-13        | 69.9        | 83.8        | 7.44       | CVA-17        | 100        | JX417852        |
| DJA-316        | CVA-17          | 79.5        | 95.1        | EV-102        | 71.3        | 80.2        | 8.18       | CVA-17        | 100        | JX417853        |
| DJI-329        | CVA-17          | 80.8        | 94.1        | EV-102        | 70.7        | 80.2        | 10.15      | CVA-17        | 100        | JX417854        |
| C08-098        | CVA-20          | 84.4        | 96.4        | EV-102        | 73.9        | 84.9        | 10.5       | CVA-20        | 97         | JX417855        |
| C08-151        | CVA-20          | 75.4        | 91.2        | EV-102        | 72.4        | 85.6        | 3.1        | CVA-20        | 99         | JX417856        |
| DJA-079        | CVA-20          | 81.4        | 95.4        | EV-102        | 71.8        | 83.9        | 9.5        | CVA-20        | 95         | JX417857        |
| DJI-027        | CVA-20          | 79.7        | 94.1        | EV-102        | 71.9        | 84.6        | 7.8        | CVA-20        | 94         | JX417858        |
| DJI-340        | CVA-20          | 75.6        | 91.5        | EV-102        | 70.6        | 83.3        | 4.9        | CVA-20        | 98         | JX417859        |
| DOU-070        | CVA-20          | 81.8        | 94.7        | CVA-13        | 71.4        | 83.3        | 10.4       | CVA-20        | 97         | JX417860        |
| KOL-125        | CVA-20          | 79.2        | 94.1        | EV-102        | 72.3        | 84.6        | 6.9        | CVA-20        | 96         | JX417861        |
| T08-167        | CVA-20          | 91.0        | 97.7        | CVA-13        | 72.0        | 83.3        | 19.1       | CVA-20        | 93         | JX417862        |
| T08-184        | CVA-20          | 78.5        | 93.1        | EV-102        | 72.5        | 84.6        | 6.0        | CVA-20        | 100        | JX417863        |
| T08-186        | CVA-20          | 83.6        | 95.4        | EV-102        | 72.3        | 84.6        | 11.3       | CVA-20        | 93         | JX417864        |
| TOK-231        | CVA-20          | 80.6        | 95.7        | EV-102        | 71.0        | 84.6        | 9.6        | CVA-20        | 95         | JX417865        |
| TOK-380        | CVA-20          | 79.7        | 93.4        | EV-102        | 70.7        | 84.6        | 9.0        | CVA-20        | 92         | JX417866        |
| T08-049        | CVA-21          | 78.2        | 93.3        | CVA-24        | 66.4        | 73.8        | 11.8       | CVA-21        | 100        | JX417867        |
| <i>T08-083</i> | <i>CVA-21</i> * | <i>70.7</i> | <i>83.9</i> | <i>CVA-24</i> | <i>65.9</i> | <i>73.8</i> | <i>4.8</i> | <i>CVA-21</i> | <i>98</i>  | <i>JX417822</i> |
| <i>T08-234</i> | <i>CVA-21</i> * | <i>70.0</i> | <i>84.2</i> | <i>CVA-24</i> | <i>66.2</i> | <i>73.8</i> | <i>3.8</i> | <i>CVA-21</i> | <i>100</i> | <i>JX417823</i> |
| C08-160        | CVA-24          | 87.1        | 95.1        | EV-99         | 73.0        | 83.0        | 14.1       | CVA-24        | 100        | JX417868        |
| DJI-026        | CVA-24          | 80.6        | 92.8        | EV-99         | 73.2        | 83.0        | 7.4        | CVA-24        | 100        | JX417869        |
| DJI-040        | CVA-24          | 79.0        | 92.1        | EV-99         | 72.6        | 81.6        | 6.4        | CVA-24        | 100        | JX417870        |
| DJI-335        | CVA-24          | 81.0        | 93.1        | EV-99         | 73.6        | 83.0        | 7.4        | CVA-24        | 100        | JX417871        |

|                |               |             |             |              |             |             |            |           |          |                 |
|----------------|---------------|-------------|-------------|--------------|-------------|-------------|------------|-----------|----------|-----------------|
| DJI-343        | CVA-24        | 79.7        | 90.5        | EV-99        | 73.2        | 81.6        | 6.5        | CVA-24    | 100      | JX417872        |
| DOU-054        | CVA-24        | 78.9        | 90.5        | EV-99        | 73.7        | 82.6        | 5.2        | CVA-24    | 100      | JX417873        |
| FOU-101        | CVA-24        | 77.8        | 93.1        | EV-99        | 72.9        | 83.3        | 5.0        | CVA-24    | 100      | JX417874        |
| G08-005        | CVA-24        | 77.2        | 91.8        | EV-99        | 72.1        | 81.3        | 5.1        | CVA-24    | 100      | JX417879        |
| KOL-156        | CVA-24        | 76.4        | 91.5        | EV-99        | 73.1        | 82.3        | 3.3        | CVA-24    | 100      | JX417875        |
| KOZ-013        | CVA-24        | 78.7        | 92.8        | EV-99        | 72.2        | 81.6        | 6.5        | CVA-24    | 100      | JX417876        |
| <i>T08-148</i> | <i>CVA-24</i> | <i>78.7</i> | <i>90.8</i> | <i>EV-99</i> | <i>72.7</i> | <i>83.3</i> | <i>6.0</i> | <i>NA</i> | <i>/</i> | <i>JX417878</i> |
| TOK-381        | CVA-24        | 77.3        | 90.5        | EV-99        | 74.1        | 83.3        | 3.2        | CVA-24    | 100      | JX417877        |
| DJI-334        | EV-C99        | 80.9        | 87.8        | CVA-24       | 71.3        | 75.5        | 9.6        | EV-99     | 100      | JX417880        |
| DJI-346        | EV-C99        | 73.3        | 88.5        | CVA-24       | 73.4        | 84.3        | -0.1       | EV-99     | 100      | JX417881        |
| DOU-064        | EV-C99        | 79.3        | 94.7        | CVA-24       | 72.6        | 81.7        | 6.7        | EV-99     | 100      | JX417882        |
| DOU-291        | EV-C99        | 78.4        | 93.1        | CVA-24       | 71.2        | 81.1        | 7.2        | EV-99     | 100      | JX417883        |
| KOL-417        | EV-C99        | 74.3        | 88.8        | CVA-24       | 71.9        | 83.3        | 2.4        | EV-99     | 100      | JX417884        |
| KOZ-022        | EV-C99        | 73.6        | 88.8        | CVA-24       | 71.8        | 82.7        | 1.8        | EV-99     | 100      | JX417885        |
| TOK-224        | EV-C99        | 74.8        | 88.8        | CVA-24       | 71.3        | 83.3        | 3.5        | EV-99     | 100      | JX417886        |
| TOK-391        | EV-C99        | 74.8        | 89.1        | CVA-24       | 72.8        | 85.0        | 2.0        | EV-99     | 100      | JX417887        |

\* Actual closest prototype is EV-C95 whose genomic sequence is not yet available in GenBank (see details in the main text).

<sup>a</sup> Isolates from healthy children are identified with codes defined by the local district (three-letter code: DJA, Djarengol; DJI, Djinglya; DOU, Dougoi; FOU, Founangue; KOL, Kolofata; KOZ, Koza; TOK, Tokombere) followed by internal laboratory code. Isolates from AFP patients are identified by codes defined by the country of origin (one-letter code: C, Cameroon; T, CHAD; g, Gabon), followed by the year of isolation (08, 2008) and internal laboratory code.

<sup>b</sup> nt, nucleotide; aa, amino acid.

<sup>c</sup> Differences between the highest and second-highest nucleotide scores.

<sup>d</sup> Serotype determined by the Automated Enterovirus Genotyping Tool Version 0.1; NA, not applicable. Isolates showing discrepancies between the two methods are labeled in italics.
